# Supplementary material for: Letting the ‘cat’ out of the bag: pouch young development of the extinct Tasmanian tiger revealed by X-ray computed tomography
Source: PubMed Central journal article supplement (PMC5830782; doi:10.1098/rsos.171914), 2018-02-21

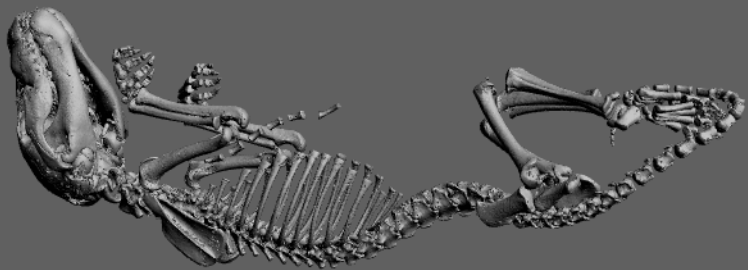

Supplement: rsos171914supp5.pdf [file rsos171914supp5.pdf]
