# Supplementary material for: Letting the ‘cat’ out of the bag: pouch young development of the extinct Tasmanian tiger revealed by X-ray computed tomography
Source: PubMed Central journal article supplement (PMC5830782; doi:10.1098/rsos.171914), 2018-02-21
Supplement: rsos171914supp8.pdf [file rsos171914supp8.pdf]

|                                 | Raw length data                | Long bone length (mm) |        |       |        | Long bone diameter (mm) - M-L / A-P ave. ** |        |       |       | Circumference (Pi x diameter) (mm) |        |       |       |
|---------------------------------|--------------------------------|-----------------------|--------|-------|--------|---------------------------------------------|--------|-------|-------|------------------------------------|--------|-------|-------|
|                                 | Specimen                       | Humerus               | Radius | Femur | Tibia  | Humerus                                     | Radius | Femur | Tibia | Humerus                            | Radius | Femur | Tibia |
| Adult,<br>subadult,<br>juvenile | C5746                          | 165                   | 164    | 198   | 196.5  | 14.19                                       | 7.43   | 13.83 | 12.24 | 44.59                              | 23.33  | 43.44 | 38.46 |
|                                 | C5749                          | 167.5                 | 153.5  | 188   | 183    | 14.15                                       | 7.71   | 14.36 | 13.16 | 44.45                              | 24.23  | 45.10 | 41.35 |
|                                 | C5752                          | 151.5                 | 153.25 | 187.5 | 187    | 12.37                                       | 6.43   | 12.35 | 11.13 | 38.85                              | 20.21  | 38.79 | 34.96 |
|                                 | C5742                          | 153                   | 159.5  | 183   | 185.25 | 12.03                                       | 6.31   | 12.15 | 10.97 | 37.79                              | 19.81  | 38.15 | 34.45 |
|                                 | C5743                          | 143.5                 | 144    | 168.5 | 168    | 11.24                                       | 5.82   | 11.32 | 9.48  | 35.31                              | 18.28  | 35.55 | 29.77 |
|                                 | C28718                         | 141                   | 139.5  | 168   | 168.5  | 11.19                                       | 6.04   | 11.53 | 10.09 | 35.15                              | 18.97  | 36.21 | 31.69 |
|                                 | C5748                          | 134.5                 | 134.5  | 165.5 | 164    | 10.41                                       | 5.54   | 10.79 | 9.34  | 32.70                              | 17.40  | 33.89 | 29.34 |
|                                 | C5750                          | 143.62                | 143.35 | 165   | 169.5  | 11.51                                       | 6.71   | 10.75 | 9.45  | 36.16                              | 21.07  | 33.78 | 29.68 |
| Pouch<br>young                  | <b>P762 *</b>                  | 39.24                 | 34.79  | 39.42 | 36.89  | 4.45                                        | 2.66   | 4.30  | 3.40  | 13.96                              | 8.36   | 13.49 | 10.67 |
|                                 | <b>A930 *</b>                  | 30.27                 | 26.43  | 28.99 | 27.51  | 3.01                                        | 1.96   | 2.74  | 2.47  | 9.46                               | 6.17   | 8.60  | 7.77  |
|                                 | <b>A931 *</b>                  | 13.82                 | 12.45  | 11.71 | 11.51  | 1.62                                        | 1.14   | 1.25  | 1.11  | 5.10                               | 3.58   | 3.92  | 3.49  |
|                                 | <b>C5755 *</b>                 | 13.19                 | 12.11  | 11.34 | 10.99  | 1.55                                        | 1.02   | 1.20  | 1.16  | 4.85                               | 3.20   | 3.75  | 3.64  |
|                                 | <b>DZCU * ave.</b>             | 5.59                  | 4.62   | 3.74  | 3.56   | 0.81                                        | 0.55   | 0.60  | 0.56  | 2.53                               | 1.72   | 1.87  | 1.76  |
|                                 | <b>Natural Log transformed</b> | Humerus               | Radius | Femur | Tibia  |                                             |        |       |       | Humerus                            | Radius | Femur | Tibia |
| Adult,<br>subadult,<br>juvenile | C5746                          | 5.11                  | 5.10   | 5.29  | 5.28   |                                             |        |       |       | 3.80                               | 3.15   | 3.77  | 3.65  |
|                                 | C5749                          | 5.12                  | 5.03   | 5.24  | 5.21   |                                             |        |       |       | 3.79                               | 3.19   | 3.81  | 3.72  |
|                                 | C5752                          | 5.02                  | 5.03   | 5.23  | 5.23   |                                             |        |       |       | 3.66                               | 3.01   | 3.66  | 3.55  |
|                                 | C5742                          | 5.03                  | 5.07   | 5.21  | 5.22   |                                             |        |       |       | 3.63                               | 2.99   | 3.64  | 3.54  |
|                                 | C5743                          | 4.97                  | 4.97   | 5.13  | 5.12   |                                             |        |       |       | 3.56                               | 2.91   | 3.57  | 3.39  |
|                                 | C28718                         | 4.95                  | 4.94   | 5.12  | 5.13   |                                             |        |       |       | 3.56                               | 2.94   | 3.59  | 3.46  |
|                                 | C5748                          | 4.90                  | 4.90   | 5.11  | 5.10   |                                             |        |       |       | 3.49                               | 2.86   | 3.52  | 3.38  |
|                                 | C5750                          | 4.97                  | 4.97   | 5.11  | 5.13   |                                             |        |       |       | 3.59                               | 3.05   | 3.52  | 3.39  |
| Pouch<br>young                  | <b>P762 *</b>                  | 3.67                  | 3.55   | 3.67  | 3.61   |                                             |        |       |       | 2.64                               | 2.12   | 2.60  | 2.37  |
|                                 | <b>A930 *</b>                  | 3.41                  | 3.27   | 3.37  | 3.31   |                                             |        |       |       | 2.25                               | 1.82   | 2.15  | 2.05  |
|                                 | <b>A931 *</b>                  | 2.63                  | 2.52   | 2.46  | 2.44   |                                             |        |       |       | 1.63                               | 1.28   | 1.37  | 1.25  |
|                                 | <b>C5755 *</b>                 | 2.58                  | 2.49   | 2.43  | 2.40   |                                             |        |       |       | 1.58                               | 1.16   | 1.32  | 1.29  |
|                                 | <b>DZCU * ave.</b>             | 1.72                  | 1.53   | 1.32  | 1.27   |                                             |        |       |       | 0.93                               | 0.54   | 0.63  | 0.56  |

\* pouch young

\*\* average of medial to lateral and anterior to posterior length
